# Supplementary material
Source: ML conference proceedings conference paper supplement (https://aclanthology.org/2021.starsem-1.9)
Supplement: OptionalSupplementaryMaterial [file pages.xlsx]

## Sheet: Sheet1
عنوان صفحه
کروناویروس
کرونای_جدید
شیوع_کروناویروس_در_ایران
مهدی_کوشکی
تب
فاطمه_رهبر
ابی
پایتخت_۶
بهرام_افشاری
امیر_جعفری
قاسم_سلیمانی
طاعون
ایران
سید_علی_خامنه‌ای
سیارک
ویروس
محمدرضا_شجریان
غلامرضا_تختی
انتخابات_مجلس_شورای_اسلامی_(۱۳۹۹–۱۳۹۸)
عبدالمالک_ریگی
ریما_رامین‌فر
دمای_بدن_انسان
ایالات_متحده_آمریکا
محسن_تنابنده
۱۹۱۷_(فیلم_۲۰۱۹)
سیمپسون‌ها
بیماری_کروناویروس_۲۰۱۹
مهران_مدیری
مطرب_(فیلم_۱۳۹۷)
اتانول
جنگ_جهانی_دوم
نشانه‌های_ظهور_قائم
عبدالحمید_ریگی
فراماسونری
فاجعه_چرنوبیل
ایتالیا
شیوع_(فیلم_۲۰۱۱)
پایتخت_(مجموعه_تلویزیونی)
جنگ_جهانی_اول
آزیترومایسین
سندرم_پای_بی‌قرار
بروس_لی
پیکی_بلایندرز_(مجموعه_تلویزیونی)
من_و_تو
هم‌گناه
امیرحسین_آرمان
هفت‌سین
روز_ولنتاین
شبی_که_ماه_کامل_شد
مافیا_(بازی_گروهی)
انگل_(فیلم_۲۰۱۹)
نشانگان_تنفسی_حاد
اوتیسم
آزادراه_تهران_-_شمال
ویتامین_دی
دل_(مجموعه_نمایش_خانگی)
قنات
احمد_جنتی
آریا_عظیمی‌نژاد
مهناز_افشار
ام‌بی‌سی_پرشیا
سیامند_رحمان
الکل
گوگوش
احمد_مهران‌فر
نوید_محمدزاده
وبا
امین_حیایی
خورشیدگرفتگی
تهران
محمد_بحرانی
محمدعلی_کشاورز
رضاشاه
پدرسالار
نسرین_نصرتی
چین
جوکر_(فیلم_۲۰۱۹)
سحر_قریشی
مترونیدازول
هایده
نازنین_نور
سیب_ممنوعه
پرشیاز_گات_تلنت
محمدرضا_پهلوی
بنیامین_بهادری
حسن_روحانی
سعید_نمکی
یکتا_ناصر
مرگ_سیاه
احسان_علیخانی
مانکن_(مجموعه_نمایش_خانگی)
ساره_بیات
صادق_قطب‌زاده
کریستیانو_رونالدو
دختر_شیطان_(فیلم_۱۳۹۶)
بهروز_وثوقی
رؤیا_نونهالی
دوپینگ_(مجموعه_تلویزیونی)
کرگدن_(مجموعه_نمایش_خانگی)
زبان_انگلیسی
میان‌ستاره‌ای_(فیلم)
دونالد_ترامپ
ووهان
صادق_خلخالی
جنگ_ایران_و_عراق
زکریای_رازی
کمونیسم
سینه‌پهلو
خشایار_الوند
بیماری_ویروسی_ابولا
جنگ_بیولوژیک
منوچهر_هادی
محمدرضا_گلزار
الیزابت_دوم
شبنم_مقدمی
مولوی
ابن_سینا
شادمهر_عقیلی
وایکینگ‌ها_(مجموعه_تلویزیونی)
آلمان
هومن_حاجی‌عبداللهی
پیمان_معادی
کیم_کارداشیان
خفاش
زمانه_(مجموعه_تلویزیونی)
سید_مجتبی_خامنه‌ای
زمین
مسعود_کیمیایی
پروپرانولول
شهاب_حسینی
آدولف_هیتلر
مهران_احمدی
الناز_حبیبی
سید_روح‌الله_خمینی
هوشنگ_ابتهاج
جشن_سپندارمذگان
کریستوفر_نولان
علی_لاریجانی
فرار_از_زندان_(مجموعه_تلویزیونی)
نازنین_بیاتی
روسیه
گلشیفته_فراهانی
برد_پیت
منظومه_شمسی
آرش_(خواننده)
نسرین_جوادزاده
مهستی
حمیرا
بازی_تاج‌وتخت
کلروکین
ترکیه
سید_صادق_حسینی_شیرازی
جنیفر_لوپز
لیلا_فروهر
ناپروکسن
امبر_هرد
آنجلینا_جولی
جمعیت_جهان
صادق_هدایت
بیل_گیتس
آلپرازولام
شقایق_فراهانی
دختر_سفیر_(مجموعه_تلویزیونی)
فرزانه_تأییدی
چرنوبیل_(مینی‌سریال)
کانادا
سیلویا_براون
هیچ‌کس
پایتخت_۵
دوستان_(مجموعه_تلویزیونی)
اسکارلت_جوهانسون
استان‌های_ایران
فهرست_شهرهای_ایران_بر_پایه_جمعیت
سازمان_جهانی_بهداشت
افغانستان
حجت_بن_الحسن
طناز_طباطبایی
پلاک_وسایل_نقلیه_در_ایران
لیونل_مسی
لئوناردو_دی‌کاپریو
فرودگاه
بریکینگ_بد
هواپیمایی_ماهان
کوروش_بزرگ
واکین_فینیکس
دنیاگیری_۲۰–۲۰۱۹_کروناویروس
دیفن‌هیدرامین
هیث_لجر
مردگان_متحرک_(مجموعه_تلویزیونی)
رامین_پرچمی
سرماخوردگی
آل_پاچینو
محمد_رسول‌اف
حامد_بهداد
تام_هاردی
سیپروفلوکساسین
باشگاه_فوتبال_پرسپولیس
بهنام_بانی
جانی_دپ
هند
علی‌اکبر_رائفی‌پور
سوسیالیسم
داروهای_ضد_تهوع
الناز_شاکردوست
رحمان_۱۴۰۰
قطعنامه
محمدباقر_قالیباف
استیون_هاوکینگ
علی_بن_ابی‌طالب
آنفلوانزا
نیکولا_تسلا
ملکه_رنجبر
مجلس_شورای_اسلامی
بریتانیا
سلمان_خان
مونیکا_بلوچی
کامیون_(مجموعه_تلویزیونی)
محمدحسین_مهدویان
شهرزاد_(مجموعه_نمایش_خانگی)
ایزوپروپیل_الکل
ویتامین_ث
رضا_علاءالدین
سیروس_مقدم
فرزان_اطهری
فهرست_پرفروش‌ترین_فیلم‌های_جهان
اسپانیا
قحطی_۱۲۹۸–۱۲۹۶_ایران
حسین_شیخ‌الاسلام
مسیح_دانشوری
مریلا_زارعی
علی_صیاد_شیرازی
ویروس_هانتا
اسکیزوفرنی
باشگاه_فوتبال_استقلال_تهران
زرتشت
ضدعفونی‌کننده
شهلا_توکلی
بانیپال_شومون
انگلستان
تلقین_(فیلم)
اختلال_دوقطبی
وست‌ورلد_(مجموعه_تلویزیونی)
هیولا_(مجموعه_نمایش_خانگی)
بعد_از_آن_(فیلم_۲۰۱۹)
فاشیسم
فمینیسم
سرخ‌پوست_(فیلم)
سعدی
ویروس_ابولا
کره_شمالی
درخت_گردو_(فیلم)
کیانو_ریوز
جواد_عزتی
فردوسی
پیتر_چک
چشمان_تاریکی
کلونازپام
سینا_ولی‌الله
فرح_پهلوی
مریلین_مونرو
حافظ
آلبرت_اینشتین
نادره_(هنرپیشه)
داریوش_(خواننده)
کیلین_مورفی
روزی_روزگاری_در_هالیوود
فرانسه
هومن_سیدی
تاریخ_ایران
حمید_هیراد
شاهرخ_خان
اتومبیل‌دزدی_بزرگ_۵
الهام_غفوری
آسیا
پادکست
عشق_ممنوع
انتخابات_ریاست‌جمهوری_ایالات_متحده_آمریکا_(۲۰۲۰)
هدایت_هاشمی
علی_صادقی
هدایت_هاشمی
علی_صادقی
پرویز_پرستویی
اینستاگرام
پرویز_فلاحی‌پور
چهارشنبه‌سوری
دنیاگیری_۱۹۱۸_آنفلوانزا
پدرخوانده
چه_گوارا
شش_(اندام)
دیجی‌کالا
پروین_اعتصامی
قاجاریان
سال‌های_دور_از_خانه_(مجموعه_نمایش_خانگی)
ابراهیم_تاتلیسس
ژاپن
ایدز
اصفهان
فریبرز_رئیس‌دانا
گلودرد_استرپتوکوکی
سوئیس
نوروز
عربستان_سعودی
سپاه_پاسداران_انقلاب_اسلامی
قرنطینه
رضا_عطاران
کارما
پایتخت_۱
امپراتوری_عثمانی
معین
شاهنشاهی_هخامنشی
متری_شیش_و_نیم
علی_ابوالحسنی_(بازیگر)
آنفلوانزای_اسپانیایی
منصوره_خجسته_باقرزاده
محمود_احمدی‌نژاد
داروی_ضد_ویروس
شهرام_شب‌پره
استرالیا
سیاوش_قمیشی
پریناز_ایزدیار
سل
غلامرضا_تختی_(فیلم)
هادی_حجازی‌فر
کانی
مایکل_جکسون
رستگاری_در_شاوشنک
امیر_جدیدی
جیسون_استاتهام
مارگو_رابی
امیرعباس_هویدا
پابلو_اسکوبار
عاشقانه_(مجموعه_نمایش_خانگی)
پسوریازیس
احمد_شاملو
ستیریزین
رونالدینیو
میلیاردرهای_جهان
فردین
نشانگان_تنفسی_خاورمیانه
هیدروژن_پراکسید
سعید_راد
سندرم_دست_بیگانه
انتخابات_مجلس_شورای_اسلامی_(۱۳۹۵–۱۳۹۴)
پاکستان
خسرو_شجاع‌زاده
لیبرالیسم
بانک_اطلاعات_اینترنتی_فیلم‌ها
قانون_تغییر_ساعت_رسمی_ایران
تراریخته
مرد_ایرلندی_(فیلم_۲۰۱۹)
جیم_کری
فلوکستین
هری_پاتر
ارباب_حلقه‌ها_(مجموعه‌فیلم)
ایده_اصلی
ثریا_اسفندیاری
تام_هنکس
اسماعیل_قاآنی
دیکلوفناک
مارکسیسم
ترلان_پروانه
گلبول_سفید
محمد_مصدق
الهام_شیخی
داعش
فتوسنتز
ایران_اینترنشنال
فرهاد_اصلانی
سلنا_گومز
نتایج_انتخابات_مجلس_شورای_اسلامی_(۱۳۹۴–۱۳۹۵)
نادرشاه
قرآن
هدیه_تهرانی
تایتانیک_(فیلم_۱۹۹۷)
پایتخت_۴
سرترالین
رابرت_دنیرو
پروستات
بیت‌کوین
زبان_فارسی
امینم
بابک_تختی
رضا_پهلوی
غلامرضا_تاجگردون
کره_جنوبی
پژمان_جمشیدی
کروناویروس_سندرم_حاد_تنفسی_۲
مجلس_خبرگان_رهبری
کیت_وینسلت
واحدهای_حافظه_رایانه
ابوالفضل_بهرام‌پور
سامورایی_در_برلین
تخت_جمشید
شنای_پروانه_(فیلم)
حمله_اعراب_به_ایران
سوئد
ماه
امید_حاجیلی
سحر_دولتشاهی
همه‌گیری_جهانی
قهوه_تلخ
جذام
مارتین_اسکورسیزی
دستگاه_گوارش
کایلی_جنر
هزارتو_(فیلم_۱۳۹۷)
متوکلوپرامید
عراق
تبریز
هوتن_شکیبا
شیراز
باکتری
عشق_اجاره‌ای
شیر_(گربه‌سان)
نرجس_خانعلی‌زاده
نیکی_کریمی
ییپ_من
رامبد_جوان
هولوکاست
خانه‌به‌دوش
کریستن_استوارت
فرزاد_فرزین
اگزیستانسیالیسم
ژوزف_استالین
گروه_ویژه_اقدام_مالی
آیت‌الکرسی
وایکینگ‌ها
مالنا
لیلا_حاتمی
ویچر_(مجموعه_تلویزیونی)
مارلون_براندو
نون_خ
دایی‌جان_ناپلئون_(مجموعه_تلویزیونی)
فارنژیت
آرش_عباسی
جمهوری_آذربایجان
ترانه_علیدوستی
نیما_شعبان‌نژاد
دستگاه_(موسیقی)
فارست_گامپ
جکی_چان
سید_بشیر_حسینی
مهدی_پاکدل
احمد_کسروی
امیر_آقایی
مهدی_طارمی
محسن_کیایی
عبدالله_جاسبی
فروغ_فرخزاد
کوئنتین_تارانتینو
کریستین_بیل
جزیره_شاتر_(فیلم)
سید_مصطفی_خامنه‌ای
شمس_تبریزی
فاصله‌ها
میا_خلیفه
امارات_متحده_عربی
هانده_ارچل
سفیکسیم
محمدرضا_فروتن
فریدریش_نیچه
نزدک
آنتی‌هیستامین
گرگ_وال_استریت
شیطان_وجود_ندارد
جمشید_هاشم‌پور
ممنوعه
هری_پاتر_(مجموعه‌فیلم)
زنان_کوچک_(فیلم_۲۰۱۹)
شاهنشاهی_ساسانی
سفالکسین
اسلام
لیسانسه‌ها
آرنولد_شوارتزنگر
خاطرات_خون‌آشام
شاهنشاهی_اشکانی
کبد
باشگاه_فوتبال_رئال_مادرید
چاکرا
۲۵_باند
سعید_آقاخانی
شوالیه_تاریکی_(فیلم)
کتایون_ریاحی
قسم_(فیلم_۱۳۹۷)
استان_مازندران
پایتخت_۲
خیام
سرطان_خون
ونتورت_میلر
ایرج_حریرچی
چاقوکشی_(فیلم)
سوگند_(خواننده)
اندانسترون
بازگشته_(فیلم_۲۰۱۵)
نازنین_احمدی
سید_ابراهیم_رئیسی
هلند
تام_کروز
ایلان_ماسک
راگنار_لودبروک
روناک_یونسی
دریای_خزر
صدام_حسین
کلردیازپوکساید
سلول
تخته_نرد
مصطفی_کیایی
علی_انصاریان
شاه‌کش
تاریک_(مجموعه_تلویزیونی)
تنگی_نفس
وینستون_چرچیل
افسانه_بایگان
خلیج_فارس
مینو_محرز
استامینوفن
پروپاگاندا
پیانیست_(فیلم)
اتحاد_جماهیر_شوروی_سوسیالیستی
قم
سازمان_مجاهدین_خلق_ایران
نوستراداموس
فرهاد_مهراد
قرص_سرماخوردگی_بزرگسالان
دوئین_جانسون
سید_محمد_خاتمی
گروه_خونی
اصغر_فرهادی
سیلوستر_استالونه
خروج_سفیانی
علی_دایی
چارلی_چاپلین
ناصر_هاشمی
زهرمار
عفونت_ادراری
تناسخ
لیندا_کیانی
کروکودیل_(فیلم)
ثریا_قاسمی
جایزه_اسکار
پالس_اکسی‌متر
توماس_ادیسون
اکرم_محمدی
بورس
ساعد_سهیلی
سیزده‌به‌در
برزو_ارجمند
مجید_سمیعی
ویکی‌پدیای_فارسی
پرواز_شماره_۷۵۲_هواپیمایی_بین‌المللی_اوکراین
دورهمی
اولین_شب_آرامش_(مجموعه_تلویزیونی)
سکوت_بره‌ها_(فیلم)
خواب‌زده
هزارپا_(فیلم)
آغامحمدخان_قاجار
جن
مسعود_مولوی
۱۰۰_نفر_(مجموعه_تلویزیونی)
هادی_غفاری
علیرضا_خمسه
عامر_خان
جن_زیبا
باشگاه_فوتبال_بارسلونا
عصر_جدید_(مسابقه_تلویزیونی)
سکولاریسم
زندگی_دیگران
کووید_۱۹
عیسی
بهناز_جعفری
اکبر_عبدی
پایتخت_۳
مهدی_هاشمی_(بازیگر)
لوراتادین
فهرست_شیندلر
مرتضی_آقاتهرانی
فورد_در_برابر_فراری
هانتاویروس
گاباپنتین
واتیکان
سیتالوپرام
مشهد
محمود_خیامی
بيمارستان_دکتر_مسیح_دانشوری
کمند_امیرسلیمانی
گرگ‌ومیش_(مجموعه‌فیلم)
خورشید
همایون_شجریان
چشم‌وگوش‌بسته_(فیلم_۱۳۹۷)
لووفلوکساسین
کوسم_سلطان
اروپا
لیگ_قهرمانان_اروپا
بهاره_افشاری
دجال
سنگاپور
ابوریحان_بیرونی
۱۳_دلیل_برای_اینکه
سیلدنافیل
کامران_و_هومن
وحید_یامین‌پور
انفجار_قطار_نیشابور
سید_جواد_رضویان
عنبرنسارا
بهاره_رهنما
شیوع_کروناویروس_ووهان
فاطمه_حقیقت‌جو
پرستیژ_(فیلم)
مرتضی_(خواننده)
یهودیت
رومن_پولانسکی
استیو_جابز
رنسانس
بیماری_پارکینسون
پرچم_ایران
فهرست_سلاطین_امپراتوری_عثمانی
سینوزیت
ونسان_ون_گوگ
عباس_بابایی
نیکول_کیدمن
جناح_اصولگرایان_جمهوری_اسلامی_ایران
پیشگیری_و_درمان_کروناویروس
دیدن_(مجموعه_تلویزیونی)
زلاتان_ابراهیموویچ
روز_صفر_(فیلم_۱۳۹۸)
کوکائین
بهائیت
دایانا،_شاهدخت_ولز
یاس_(خواننده)
حوزه_انتخابیه_تهران،_ری،_شمیرانات،_اسلامشهر_و_پردیس
روح‌الله_زم
سید_مصطفی_میرسلیم
یوسف_پیامبر
طالبان
ولادیمیر_پوتین
زیگموند_فروید
سرطان_ریه
اسکندر_مقدونی
گلاره_عباسی
لیلةالرغائب
شارلیز_ترون
چشمان_کاملاً_بسته
علی‌اکبر_ولایتی
ارباب_حلقه‌ها:_یاران_حلقه
شورای_نگهبان
ژرژ_پطرسی
بی‌تی‌اس_(گروه_موسیقی)
توسیلیزومب
تاجیکستان
احمدشاه_قاجار
امیلیا_کلارک
سعید_کریمیان
نروژ
آیدین_نیکخواه_بهرامی
فهرست_داروهای_ضد_ویروس
کیتی_پری
نیویورک
عید_پاک
حسین_الهی_قمشه‌ای
نگار_عابدی
روزی_روزگاری_(مجموعه_تلویزیونی_ایرانی)
وزارت_بهداشت،_درمان_و_آموزش_پزشکی
قلب
دلنوازان
سید_محمدحسین_شهریار
سیامک_اطلسی
بابک_امینی
ناسا
درخت_زندگی_(فیلم)
یونان
رضا_صادقی
حسین_تهی
اسکات_ادکینز
در_حاشیه
هابیت_(مجموعه‌فیلم)
مثلث_برمودا
پرواز_همای
بوریس_جانسون
جناح_اصلاح‌طلبان_جمهوری_اسلامی_ایران
موسی
محمد_علی_کلی
رضا_پیشرو
سیامک_انصاری
مرد_دوهزارچهره
جنگ_ستارگان
محمدرضا_راه‌چمنی
سید_محمد_میرمحمدی_(زاده_قم)
درخونگاه_(فیلم)
فتحعلی_اویسی
کیخسرو
سلمان_بن_عبدالعزیز_آل_سعود
جایزه_بزرگ_(مجموعه_تلویزیونی)
تورخان_سلطان
سید_هاشم_بطحایی_گلپایگانی
انتخابات_ریاست‌جمهوری_ایران_(۱۳۹۶)
آب
مسیح_علی‌نژاد
آبله‌مرغان
ناپلئون_بناپارت
معصومه_ابتکار
سید_پرویز_فتاح
امیر_نوری
محمد_قریب
فریدون_فرخزاد
کاترینا_کایف
آهک
ارلینگ_برات_هولاند
نادر_جهانبانی
حسین_روازاده
سرو_زیر_آب
مهدی_قایدی
ال_کلاسیکو
شرف_شمس
ببر
حملات_۱۱_سپتامبر
داستان_عامه‌پسند
بینوایان
پردنیزولون
ابراهیم_یزدی
امیرمحمد_متقیان
پاییز_صحرا
لیندا_لی_کدول
خسرو_شکیبایی
حسن_عسکری
برونشیت
فهرست_رؤسای_جمهور_ایالات_متحده_آمریکا
شهاب‌سنگ
میترا_حجار
منصور_(خواننده)
کروناویریده
آنارشیسم
اچ‌آی‌وی
اکبر_هاشمی_رفسنجانی
یهودی
دانکرک_(فیلم_۲۰۱۷)
سید_محمود_طالقانی
جانوران
کویت
مینا_جعفرزاده
فردی_مرکوری
قصر_شیرین_(فیلم)
مهدی_باکری
علامت_بیماری
آنا_د_آرماس
ورم_لوزه
باشگاه_فوتبال_لیورپول
ام‌اس
ابراهیم_یکم
فروشنده_(فیلم_۱۳۹۴)
آنفلوانزای_خوکی
سارا_بهرامی
مسیحیت
علیرضا_بیرانوند
امیرحسین_رستمی
هنگ_کنگ
فرزانه_فصیحی
روز_مهندس
پیلوت_(فیلم)
مهدی_بازرگان
آزیتا_لاچینی
لیگ_برتر_خلیج_فارس
جندالله
عایشه‌گل_جوشکن
سام_درخشانی
جاستین_بیبر
حمله_مغول_به_ایران
حمید_گودرزی
یوهان_سباستیان_باخ
اسکندر_فیروز
صندوق_توسعه_ملی_ایران
چارلز،_شاهزاده_ولز
حسین_بن_علی
جنیفر_آنیستون
دستگاه_ایمنی
محمود_حسابی
پی‌ام‌سی_موسیقی
ماهور_الوند
جف_بیزوس
مانک
ناتالی_پورتمن
نوروز_در_ایران_باستان
تیمور
بهرام_رادان
دوره_دهم_مجلس_شورای_اسلامی
اندی
آناستازیا_مایو
اورلاندو_بلوم
دیگو_مارادونا
پرندگان_شکاری_(فیلم_۲۰۲۰)
مصر
صبا_کمالی
میگرن
دره_شیرز
جومانجی:_مرحله_بعدی
کارمل_مور
پرستو_گلستانی
آموکسی‌سیلین
بهنوش_بختیاری
بیماری_کرون
ابوالحسن_بنی‌صدر
ویل_اسمیت
بهنوش_طباطبایی
میرحسین_موسوی
سید_محمدکاظم_شریعتمداری
برنی_سندرز
استیون_اسپیلبرگ
رادیو_جوان_(اینترنت)
فرامرز_اصلانی
امیرارسلان_مطهری
فرگشت_انسان
آمار_انتخابات_ریاست‌جمهوری_ایران_(۱۳۹۶)
ستایش_(مجموعه_تلویزیونی)
زمین‌لرزه
شش_زیرزمینی
شش_قهرمان_و_نصفی
میزان_مشارکت_در_انتخابات_مجلس_شورای_اسلامی_(۱۳۹۰–۱۳۹۱)
سرکه
برج_میلاد
مالاریا
غلامعلی_حداد_عادل
نتایج_انتخابات_مجلس_شورای_اسلامی_(۱۳۹۹–۱۳۹۸)
داریوش_فرضیایی
جو_بایدن
شاهنامه
شکستن_همزمان_بیست_استخوان
آشغال‌های_دوست‌داشتنی
علی_کریمی
درمان_اچ‌آی‌وی/ایدز
دن_بیلزریان
روشنک_گرامی
درجه‌های_نیروهای_مسلح_ایران
سوفی_و_دیوانه
لاست
باران_کوثری
محمود_صادقی
نیلوفر_خوش‌خلق
گلادیاتور_(فیلم_۲۰۰۰)
لئون_حرفه‌ای
شهناز_پهلوی
لورل_و_هاردی
زندانی‌ها
گرگ
۲۳_نفر
پویا_(خواننده)
فرهاد_مجیدی
امیرکبیر
سعید_امامی
قاره
اشو
حمید_فرخ‌نژاد
ریوردیل
رهبر_جمهوری_اسلامی_ایران
سیاه‌چاله
خرگوش
روز_مادر
عسل_بدیعی
محمد_بن_سلمان
گوهر_خیراندیش
من_پیش_از_تو_(فیلم)
پرویز_خسروانی
انتخابات_ریاست‌جمهوری_ایران_(۱۴۰۰)
پنی‌سیلین
میکروب
دودمان‌های_ایران
احمد_متوسلیان
حسن_مهمانی
انتخابات_مجلس_شورای_اسلامی_۱۳۹۵–۱۳۹۴_(حوزه_انتخابیه_تهران،_ری،_شمیرانات،_اسلامشهر_و_پردیس)
مریم_میرزاخانی
پوریا_پورسرخ
سید_موسی_شبیری_زنجانی
بهزاد_لیتو
زونا
جهان_با_من_برقص
دیازپام
نت‌فلیکس
همایون_خسروی
آناهیتا_همتی
ایرج_قادری
آنتونی_استوکس
دهستان
اشکان_خطیبی
جمشید_مشایخی
داستان_ازدواج
سید_هادی_خسروشاهی
محمدرضا_حیاتی
هوشنگ_ظریف
پوریم
ویروس_آنفلوانزای_A_زیرگروه_H1N1
یوسف
مسجد_جمکران
رضا_رشیدپور
جان_سینا
سیاوش_شمس
شب_برات
درخشش_ابدی_یک_ذهن_پاک
مهران_غفوریان
سی_و_هشتمین_جشنواره_فیلم_فجر
مجمع_تشخیص_مصلحت_نظام
میهمان_(مجموعه_تلویزیونی)
موسی_کاظم
استان_خوزستان
کفرناحوم_(فیلم)
سید_عطاءالله_صالحی
زهرا_سعیدی_مبارکه
انقلاب_۱۳۵۷_ایران
شبکه_یک
لوزالمعده
اما_واتسون
کن_مایلز
شیعه
نورگل_یشیلچای
شهره_صولتی
دوره_آکواریوس
سایپا_شاهین
خروج_(فیلم_۱۳۹۸)
حمید_لولایی
بامب‌شل_(فیلم)
بهروز_به‌نژاد
احمد_امیرآبادی_فراهانی
رقص_روی_شیشه
جبهه_پایداری_انقلاب_اسلامی
ویلیام_شکسپیر
خاک
تاریخ_ایران_باستان
شهلا_میربختیار
پولک‌پوست
نسیم_ادبی
فونیکه_سی
مرکبات
افسانه_بروس_لی
بهرام_بیضایی
استان_تهران
رئیس_مجلس_شورای_اسلامی
فاویپیراویر
خواجه_نصیرالدین_طوسی
شانون_لی
دستگاه_تنفس_مصنوعی
پانته‌آ_پناهی‌ها
نرگس_آبیار
میس_سان‌شاین_کوچولو
هاروی_واینستین
سید_هاشم_بطحائی_گلپایگانی
حرم_عسکریین
خوب،_بد،_جلف_۲:_ارتش_سری
پنج_فوت_جدا
علی_خلفی
واریکوسل
مسعود_رجوی
سلکوکسیب
حمله_موشکی_ایران_به_نیروهای_آمریکایی_در_عراق
رابرت_لوینسون
مار
آندریا_بوچلی
نجات_سرباز_رایان
دموکراسی
دروغ_اول_آوریل
ماه‌گل_مهر
محمدرضا_علیمردانی
جومونگ_(سریال_تلویزیونی)
سید_جعفر_کریمی_دیوکلایی
جوخه_انتحار_(فیلم_۲۰۱۶)
ماری_کوری
نورالدین_پیرمؤذن
ابد_و_یک_روز
مجید_انصاری
فهرست_نمایندگان_مجلس_شورای_اسلامی
محسن_پیرهادی
در_حاشیه_۲
کیرا_نایتلی
جشنواره_فیلم_فجر
نازنین_فراهانی
لودویگ_فان_بتهوون
مأموریت_(فیلم_۱۳۶۵)
محمود_کلاری
محسن_کنگرلو
خانه_پدری
ویروس_پاپیلوم_انسانی
بابا_ونگا
سید_حسن_آقامیری
زهره_الهیان
ترخینه
علی_عبده
اصغر_قاتل
مبعث
محمدرضا_شریفی‌نیا
دستگاه_گردش_خون
فهرست_کشورها_بر_پایه_ذخایر_نفتی
ابراهیم
شورای_ائتلاف_نیروهای_انقلاب_اسلامی
محسن_نامجو
فاطمه_زهرا
رسلمانیا_۳۶
قتل_جوان_۱۹_ساله_مهابادی
الیاس_نادران
پرویز_کاردان
عبدالله_عبدالله
بروکلین_بی‌مادر
آمار_انتخابات‌های_ریاست‌جمهوری_ایران
سردار_آزمون
مراد_چهارم
علی_ضیا
لیگ_قهرمانان_آسیا
محمدحسین_باقری
کیانوش_جهانپور
سکته_مغزی
تبدیل‌شوندگان_(فیلم)
حسنی_مبارک
محمود_پاک‌نیت
خون_شد
حسن_شماعی‌زاده
محمدابراهیم_همت
جزایر_لانگرهانس
التهاب_گوش
نیروی_قدس_سپاه_پاسداران_انقلاب_اسلامی
پیشونی‌سفید_۳
نشانگان
لادن_مستوفی
پدر_(مجموعه_تلویزیونی_۱۳۹۷)
راسل_کرو
انتخابات
مجید_مجیدی
ژاله_علو
جوکر_(شخصیت)
کالیفرنیا
سید_مرتضی_آوینی
شهیار_قنبری
کتاب_سبز_(فیلم)
مایک_تایسون
نازنین_زاغری
لوزه
بیژن_پاکزاد
مرتضی_مطهری
پیشونی‌سفید_۲
پروتئین_واکنشی_سی
منطقه_۱۳_شهرداری_تهران
لیلا_اوتادی
نبرد_قرقیسیا
شب‌های_برره
آمیتاب_باچان
لعیا_زنگنه
ازبکستان
دراگان_اسکوچیچ
سید_محمد_بهشتی
انتخابات_مجلس_شورای_اسلامی
کرونا_(برق)
محمد_علیزاده
محمدعلی_رجایی
شاهرخ
ماجرای_مک‌فارلین
علیرضا_آرا
سیروس_الوند
لوچانو_پاواروتی
عزت‌الله_اکبری_تالارپشتی
بیوتروریسم
مهدی_فخیم‌زاده
مسعود_پزشکیان
محسن_مخملباف
مؤسسه_خیریه_مولی‌الموحدین
طب_ملکی
علیرضا_مرندی
محمدتقی_بهجت
هومن_بهمنش
حسین_طائب
باشگاه_فوتبال_استقلال_تهران_در_رقابت‌های_آسیایی
شیرگاه
ویگن
آیدا_فقیه‌زاده
استان_گیلان
۱۳۹۹_(خورشیدی)
سید_روح‌الله_خاتمی
سرگذشت_ادی_دوچین
هوش_مصنوعی
زندگی_با_چشمان_بسته
تلگرام
نسرین_ستوده
سید_عباس_موسوی
نفت_کوره
المعز_علی
نفت_برنت
چینو_(فیلم_۱۹۷۳)
شیطان_(فیلم_۲۰۰۳)
ابوالحسن_صبا
حبیب‌الله_سیاری
زیر_نور_ماه
مستانه_(شاهدخت_هندی)
کامیون_(فیلم)
اسپارتاکوس
پیچ_اشتباه_(مجموعه‌فیلم)
شرم_(فیلم_۲۰۱۱)
ابراهیم_خلیل‌الله
مرتضی_قزوینی
جمهوری
موزه_مولوی
محمدرضا_مهاجری
الکس_رودریگز
سالند
تحصیل
هامان_(شخصیت_انجیل)
مراکش
جبهه_متحد_اصولگرایان
علی_آقامحمدی
علی_زند_وکیلی
یک_کیلو_و_بیست_و_یک_گرم
هائیتی
حمید_منوچهری
جان_تراولتا
اژدهای_سرخ_(فیلم)
صائب_تبریزی
تصوف
لیام_پین
مسجد_ابوذر
مانوک_خدابخشیان
جوی_(فیلم)
قشلاق
انتخابات_ریاست‌جمهوری_افغانستان_(۱۳۹۸)
جین_سیمونز
ام‌آی‌ام-۲۳_هاوک
روز_پزشک
گورستان_ابن‌بابویه
ملیحه_نیکجومند
پادشاه_دزدان_(فیلم_۲۰۱۸)
جمال_شورجه
کلویی_کارداشیان
استیو_مک‌کوئین
بیلی_پورتر
ملی‌گرایی
کلیمی
حسین_کسبیان
مریم_مقدس_(فیلم)
ماهسون_قرمزی‌گل
دبیرکل_سازمان_ملل_متحد
سوگلی_(فیلم_۲۰۱۸)
علی‌اصغر_عنابستانی
محمدمهدی_مفتح
پوراندخت_مهیمن
زهره_مجابی
بادگیر
ترسی_گیبسون
پیشتازان_فضا_(فیلم)
عبدالحسین_تیمورتاش
لطف‌الله_دژکام
سازمان_بازنشستگی_کشوری
گرتا_تونبرگ
گل_یخ_(فیلم)
محمد_یعقوب_بیگ
شاپور_مرحبا
فرخ_نگهدار
کمال_فروغی
شادکامی
عبدالله_کرمی
تالش
کارآگاه_حقیقی
مهدی_خلجی
خانواده_روتشیلد
پیلار_روبیو
ولادیمیر_لنین
رامشه
گورستان_ظهیرالدوله
جزیره_اشک
فیونا_موتسی
آواز_گنجشک‌ها
سقز
شکار_موش
حسام_نواب_صفوی
اندی_گارسیا
گارد_جاویدان_(پهلوی)
بهرام_توکلی
شهباز_حسن‌پور_بیگلری
الهام_کردا
عبدالقادر_گیلانی
دزدی_دریایی_در_سومالی
پل_خواجو
پطرس_غالی
زهرا_اشراقی
ظهر_شانگهای
کتاب_هنری
منچ
بنت‌الهدی_صدر
تاج_(مجموعه_تلویزیونی)
ری‌استارت
خاطرات_قتل
نعیمه_نظام‌دوست
شهرستان_اسلامشهر
بازی‌های_المپیک
الهام_فخاری
کاظم_روشن_ضمیر
یورگن_کلوپ
چارلز_برانسون
پروین‌دخت_یزدانیان
فرامرز_صدیقی
محمدعلی_اسلامی_ندوشن
مه_(فیلم_۲۰۰۷)
ناو_هواپیمابر
کوپال_ناظمی
رشدی_رچبر
سیزده_(فیلم_۱۳۹۱)
هوشنگ_گلشیری
ریگی_(طایفه)
جنگ_۷۷
شاهدخت_آن
عشق_ممنوع_(رمان)
محمد_فیلی
محمد_دادکان
سحر_تبر
ملیحه_نصیری
پیام_صابری
تیم_ملی_فوتسال_ایران
نلی
اکسید
نظام_انتخاباتی
کودک_و_فرشته
حمله_حیدری
جین_سیبرگ
سبزینه
مهدی_مروارید
ابوالفضل_ابوترابی
هشدار_برای_کبرا_۱۱
قصه‌های_مجید
سنی
توئین_پیکس:_تکه‌های_گمشده
طاهر_بن_حسین
چنگدو_جی-۱۰
آنزیم_۲_مبدل_آنژیوتانسین
اسلحه_مرگبار_۴
خانه_ابتهاج_(ارغوان)
محمدرضا_صباغیان
مانی
نوح
آرگو_(فیلم_۲۰۱۲)
جودی_گارلند
احمدبن_یحیی_بلاذری
شیکاگو_(فیلم_۲۰۰۲)
نوایی_نوایی
بالا_در_آسمان_(فیلم_۲۰۰۹)
دگزامتازون
فرنگیس_فروهر
نادر_قاضی‌پور
ایستاده_در_غبار
احضار_(فیلم_۲۰۱۳)
فرار_از_زندان_(فصل_۶)
ایرج_طهماسب
ترور_نافرجام_سید_علی_خامنه‌ای
زیر_بازارچه_(مجموعه_تلویزیونی_۱۳۷۷)
سعید_ملکان
انوشیروان_ارجمند
لبه_تیغ_(رمان)
شاه_نعمت‌الله_ولی
محمدولی_قرنی
پزشکان_بدون_مرز
پروانه_(مجموعه_تلویزیونی)
رضا_شفیعی‌جم
یأجوج_و_مأجوج
نوش‌آفرین
مگان،_دوشس_ساسکس
علیرضا_حقیقی
آیات_شیطانی
شهبال_شب‌پره
محمدرضا_عارف
محمدعلی_طاهری
حوزه_انتخابیه_اصفهان
مرزهای_ایران
صادق_طباطبایی
اشنویه
علی_ابوالحسنی
بن_افلک
سنگ_آذرین
آناهیتا_درگاهی
سید_محمد_میرمحمدی_(نماینده_مجلس)
شاهرخ_استخری
خاورمیانه
انتقام‌جویان:_پایان_بازی
عارف_(خواننده)
ام‌آی‌ام-۱۰۴پاتریوت
ابوالقاسم_صلواتی
سرنوشت_شگفت‌انگیز_املی_پولن
مسعود_فراستی
مصطفی_چمران
رونی_مارا
شاپور_بختیار
زری_خوشکام
بهنام_صفوی
حسینعلی_منتظری
اشغال_ایران_در_جنگ_جهانی_دوم
مرد_هزارچهره_(مجموعه_تلویزیونی)
نرگس_خاتون
سید_محمد_میرمحمدی
شهلا_ریاحی
نشنال_جئوگرافیک_فارسی
اینگرید_برگمان
همه‌پرسی_نظام_جمهوری_اسلامی_در_ایران
علیرضا_پهلوی_(دوم)
گاه‌شماری_هجری_خورشیدی
آیشواریا_رای
عارف_لرستانی
رشت
مارمولک_(فیلم)
چهارراه_استانبول_(فیلم)
گیتی_پاشایی
فوزیه
قوه_قهریه
حیاط
دایناسور
سعید_پورصمیمی
سید_احمد_آوایی
جنگ_ویتنام
جومانجی:_به_جنگل_خوش_آمدید
سالار_عقیلی
عبدالحسین_روح‌الامینی
باشگاه_فوتبال_یوونتوس
راه_دررو
لئوناردو_دا_وینچی
فاویپراویر
ضدعفونی‌کننده_دست
سرسپرده
سیمپسون‌ها_(فیلم)
محمداشرف_غنی
تارا_گرامی
سوریه
حمید_رسایی
پرویز_نوری
باربارا_استرایسند
ویکی‌پدیا
آرام‌اس_تایتانیک
اسدالله_لاجوردی
اسحاق_جهانگیری
مهدی_یراحی
حسین_دهباشی
دین_کونتز
گاه‌شماری_شاهنشاهی
پی‌کی_(فیلم)
مهراوه_شریفی‌نیا
رانیتیدین
حسن_قزوینی
احمدرضا_پوردستان
ارمنستان
کلیه
دنیاگیری
پری_امیرحمزه
ماریو_مانجوکیچ
روز_پدر
علی_مطهری
همه‌گیری_جهانی_۲۰–۲۰۱۹_کروناویروس
ملکه_ویکتوریا
طاعون_خیارکی
احمد_سبحانی
عمر_بن_خطاب
پولاد_کیمیایی
گوشت_خفاش
آویشن
شعله_(فیلم_۱۹۷۵)
کرمانشاه
تینا_آخوندتبار
باب‌اسفنجی_شلوارمکعبی
نماز_جمعه
شیخ_بهایی
تستوسترون
سفیانی
گورستان
حمید_شب‌خیز
بزرگ_علوی
تیفوس
زدبازی
اسهال
مورچه‌خوار
زیر_پای_مادر
سعید_کنگرانی
جنگ_داخلی_سوریه
یه_حبه_قند
توپاک_شکور
شکیرا
شیلا_خداداد
احمد_کاظمی
آل_سعود
مرز_سه‌گانه_(فیلم)
شکار_(فیلم_۲۰۱۲)
میلان_کوندرا
مسعود_سلیمانی
پیمان_قاسم‌خانی
جاستین_ترودو
عباس_کیارستمی
سید_احمد_خمینی
وزارت_اطلاعات
سادات
محمود_جعفری_(بازیگر)
امل_سایین
پاناویا_تورنادو
حمیدرضا_آذرنگ
مسعود_اسداللهی
جان_ویک:_بخش_۳_–_پارابلوم
حسن_جوهرچی
تیلور_سوئیفت
پاساژ_علاءالدین
حسین_لشکری
مریخ
عدنان_زرفی
زولپیدم
مزدیسنا
لیلا_زارع
شهرآورد_تهران
عماد_مغنیه
جی._آر._آر._تالکین
اسب
محمد_چهارم
حوزه_انتخابیه_ارومیه
رجب_(ماه)
نگار_جواهریان
گومورا_(مجموعه_تلویزیونی)
گابریل_گارسیا_مارکز
جن‌گیر_(فیلم)
کامیلا،_دوشس_کورنوال
نشانگان_داون
جنگ‌های_صلیبی
پچ_آدامز_(فیلم)
هنری_پنجم_(انگلستان)
سیمگه
هوگو_(فیلم)
گلاره_ناظمی
هیلی_استاینفلد
سوپر_استار_(فیلم)
پدرخوانده:_قسمت_سوم
سریع_و_خشمگین_۹
محمدحسن_ممقانی
حوزه_انتخابیه_بابل
جلال_آل‌احمد
مسافران_(فیلم_۲۰۱۶)
شهرستان_اشنویه
جاستین_ماسک
شرکت_میهن
راه_اژدها
بچه‌های_آسمان
حرم_کاظمین
رپ_فارسی
رنی_زلوگر
تصادف_(فیلم_۲۰۰۴)
کیومرث_پوراحمد
مارکوس_آئورلیوس
مینا_لاکانی
ماهایا_پطروسیان
پرویز_یاحقی
مک‌دانل_داگلاس_اف/ای-۱۸_هورنت
کاشمر
مردم_ارمنی
باشگاه_فوتبال_آرسنال
گناه_اصلی_(فیلم_۲۰۰۱)
بدرالزمان_قریب
نیکلاس_کیج
پناهگاه_امن_(فیلم)
دزیره_کلاری
خرس
مهدی_کوچک‌زاده
بهرام_دهقان
سونگ_کانگ-هو
شمارش_معکوس_(فیلم_۲۰۱۹)
تگرگ
ژاله_صامتی
هفت_خان_رستم
رامین_مهمان‌پرست
مردی_برای_تمام_فصول
جان‌سخت_۴
سیاره
مهتاب_نصیرپور
امرالله_احمدجو
سید_علیرضا_آوایی
حسن_امیدزاده
اشک‌های_خورشید
به_وقت_شام
آتش_تقی‌پور
دختر_آبی
استان_لرستان
مهرداد_میناوند
سیاوش_مفیدی
محسن_یگانه
کامران_دانشجو
هایله_سلاسی
آبادان
خاک_سرخ
شاهزاده_ویلیام،_دوک_کمبریج
دین-چارلز_چپمن
ناصر_چشم‌آذر
صحیفه_سجادیه
فرهنگ
شکافته_(فیلم_۲۰۱۶)
گروپ_یوروم
آلبر_کامو
داوود_حیدری
محمد_مرسی
یوسف_صانعی
روز_جهانی_تئاتر
هنگامه_اخوان
لگولاس
حجاب_اسلامی
میدان_گازی_رام
مارچوبه
سانجیو_کومار
فریبرز_عرب‌نیا
کارینا_کاپور
نوآ_جوپ
فیصل_بن_عبدالعزیز_آل_سعود
بهمن_محصص
ناصر_ممدوح
سکسکه_(فیلم)
الانزاپین
سیگار
تیهو
گراز
بقیع
جام_حذفی_فوتبال_انگلستان
رابرت_داونی_جونیور
طرح‌های_پیشنهادی_برای_تقسیمات_کشوری_در_ایران
غلامعلی_اویسی
موزه_مادام_توسو
ایکوالایزر_(فیلم)
داوید
بازی_مرگ
مریم_امیرجلالی
الف_(سرزمین_میانی)
امره_جان
باشگاه_فوتبال_شهر_خودرو
مریم_مجدلیه
عمان
سرود_برابری
کاکو_(فیلم)
حسابدار_(فیلم_۲۰۱۶)
خلیل_سلطان
دوره_نهم_مجلس_شورای_اسلامی
تبدیل‌شوندگان:_انتقام_فالن
عبدالعلی_علی‌عسگری
زندگی_ادل
یک_مکان_ساکت
مارینا_آبراموویچ
جسیکا_آلبا
هارپ
بهار
آراگورن_دوم
پیچند
گنجشک_سرخ
آناکینرا
رانویر_سینگ
اژدها_وارد_می‌شود
شهاب‌سنگ_چلیابینسک
جان_تنیل
پالایشگاه_نفت_آبادان
پیمان_دوستی
دفترچه_خاطرات_(فیلم_۲۰۰۴)
اومیفنوویر
نورالله_طبرسی
ماهواره‌های_ایران
پگاه_آهنگرانی
محمدحسین_کنعانی‌زادگان
دره_سیلیکون_(مجموعه_تلویزیونی)
محمد_مختاری_(بازیکن_فوتبال)
مجلس_شورای_ملی
جیش_العدل
زهرا_نعمتی
کامبوزیا_پرتوی
شور_(دستگاه_موسیقی)
وینی_مادیکیسلا-ماندلا
سید_احمد_فردید
حامد_آهنگی
گلبول_قرمز
خالد_بن_عبدالعزیز_آل_سعود
حسن_خیاط‌باشی
پترا
بنی_گانتس
دانی_ین
حزب‌الله_لبنان
ناصر_محمدخانی
تلولاه_ریلی
محمد_آشوری_تازیانی
فراواقع‌گرایی
آزیتا_حاجیان
محمد_کاسبی
اخراجی‌ها_۳
جایزه_اسکار_بهترین_بازیگر_نقش_اول_مرد
غریزه_اصلی
نرگس_فولادوند
کلئوپاترا
اجاره‌نشین‌ها
مرجان_ساتراپی
محمد_بن_سلمان_آل_سعود
سید_محسن_حبیبی
باشگاه_فوتبال_پاری_سن_ژرمن
کلر
ایستگاه_فضایی_بین‌المللی
لیدی_گاگا
ترنس_هیل
استرالیا_(فیلم_۲۰۰۸)
هوگو_ویوینگ
شاهزاده_روم
مگ_(فیلم)
آفریقا
خاک‌سپاری
اسامه_بن_لادن
سازمان_حفاظت_محیط_زیست_ایران
محمدجواد_ظریف
ببر_مازندران
ژیلا_تقی‌زاده
رجب_رحمانی
عادل_بزدوده
جنگل‌های_آمازون
خواب_سفید
اسماعیل_میرفخرایی
ام_کلثوم_(خواننده)
نیما_عظیمی‌نژاد
جانلوئیجی_بوفون
پاتال_و_آرزوهای_کوچک
لیلی_بروجردی
غلام‌محمد_زارعی
سید_علی_سیستانی
آموزش_عالی_در_ایران
رؤیای_شب_نیمه_تابستان
محمد_سلوکی
سوشا_مکانی
شاه_بزرگ
ملا_ممدجان
ایوانا_ترامپ
یونا_تدین
حسن_معجونی
شام_ایرانی
مردم_لک
استر_(شخصیت)
دختر_میلیون‌دلاری
کارل_گوستاو_یونگ
ضربه_مغزی_(فیلم_۲۰۱۵)
مرد_عنکبوتی:_دور_از_خانه
کارا_دلوین
بلک_کتس
دانشگاه_آزاد_اسلامی_واحد_جیرفت
کتاب_استر
پروانه_مافی
جنگ_خلیج_فارس
امید_نورافکن
لاله_و_لادن_بیژنی
داریوش_فرهنگ
تمامیت‌خواهی
اعتدال_بهاری
ایپ_من_۴
محمدرضا_رودکی
سروش_خلیلی
پیام_صادقیان
هتل_بمبئی
فصل_نرگس
جنیفر_کانلی
طیب_شرافتی
فهیمه_راستکار
شهاب_مظفری
چشمه_بل
لوگان_(فیلم)
ادی_عقاب_ادواردز
چلسی_منینگ
زمین‌لرزه_۱۳۷۵_اردبیل
استیون_بیت‌آشور
قحطی_۱۲۵۰–۱۲۴۹_ایران
کوروش_تهامی
هنری_کیسینجر
کرم‌چاله
ماجرای_نیمروز:ردخون
فرزانه_کابلی
پدینگتون_(فیلم)
علی_مصفا
حسین_ذوالفقاری
نرگس_محمدی_(روزنامه‌نگار)
مریم
کاتیوشا
جلال‌الدین_ماشاریپوف
سرژ_گنابری
ناخدا_خورشید
پیانو
مارتیک
حلیمه_سعیدی
نیما_فلاح
کروموزوم
ساعت_رسمی_ایران
اسپیس‌اکس
اسکار_پیستوریوس
مقنع
حسین_فردوست
زندان_اوین
رزمند_پایک
جولیا_رابرتس
دو_فیلم_با_یک_بلیت
سهیلا_عزیزی
نوری_کسرایی
ایکر_کاسیاس
هملت
قاسمعلی_ظهیرنژاد
بر_دروازه_ابدیت_(فیلم)
ده_فرمان_(فیلم_۱۹۵۶)
ژان_والژان
مونته‌نگرو
دانیل_دی-لوئیس
پسر_کابلی
کشتار_طنطوره
موسیقی_کلاسیک
حدیث_ثقلین
خانواده_قرمزیان
وحید_امیری
مهمان_نامرئی
آتش‌سوزی_سینما_رکس_آبادان
پرونده_خون‌های_آلوده
سهراب_مرادی
احمدرضا_عابدزاده
مسعود_معینی
کلیله_و_دمنه
جامعةالمصطفی_العالمیه
بحران_مالی_۲۰۰۸-۲۰۰۷
مسیح_مهاجری
سید_مهدی_حسینی_شیرازی
باکلوفن
حمید_غلامعلی
فریبرز_اسماعیلی
سالومه
گاه‌شماری_جلالی
رضا_محمدی_لنگرودی
مهدی_سپهر
لا_لیگا
پر_پرواز_(فیلم)
امامزاده_قاضی_صابر
تد_باندی
مهدی_حاجتی
شهبانو_تئا_موزا
ایزابلا_ویدوویچ
سامان_قدوس
حمید_شهریاری
باغ
حمله_هوایی_۲۰۲۰_به_فرودگاه_بین‌المللی_بغداد
اردکان
بهار_دلکش
سلطان_قلب‌ها
پمپئی
شهین_علیزاده
غزال_عنایت
مهدی_کروبی
سیل_۱۳۹۸_لرستان
سرنوشت_خشمگین
حامد_کرزی
یک_خانواده_محترم
انتخابات_ریاست‌جمهوری_ایران
کول‌بر
کانگانا_رانوت
منوچهر_والی‌زاده
آرش_سبحانی
اتفاق_(برنامه_تلویزیونی)
سیده_فاطمه_ذوالقدر
بتامتازون
فقیهه_سلطانی
ماشین‌های_هیولا
هما_روستا
داوود_محمدی_(نماینده_قزوین)
جان‌سخت
ناصر_کنعانی
دیوار_بزرگ_(فیلم)
نجات_لنینگراد
میکل‌آنژ
هستی_مهدوی‌فر
آرامگاه_فردوسی
باب_راس
سید_احمد_علم‌الهدی
طبقه‌بندی_علمی_جانداران
امیر_کاظمی
جم_اوزر
سه_زن
ریور_فینیکس
روز_باشکوه
منصور_سپهرنیا
اسلتامیویر
کتاب_جنگل_(فیلم_۲۰۱۶)
ریویل
جیپسی_کینگز
لیلا_نظام‌الدین_امامی
مفنامیک_اسید
یوسیپ_ایلیچیچ
سم_مندس
آئرو_ال-۳۹_آلباتروس
سرطان_پستان
زدراکو_رایکوف
یواس‌اس_باتان_(ال‌اچ‌دی-۵)
همه‌گیرشناسی
دعای_کمیل
مهاتما_گاندی
راه‌پیمایی_۲۲_بهمن
مالزی
تب_خونریزی_دهنده_به_همراه_سندرم_کلیوی
شیلا_(خواننده)
بیژن_مرتضوی
نژاد_زرد
ببر_خیزان،_اژدهای_پنهان
ریچل_وایس
پرویز_پورحسینی
محبوبه_بیات
ایرج_بسطامی
ساموآ
وزارت_کشور_(ایران)
هیو_جکمن
کلبه_(فیلم_۲۰۱۷)
آنتونی_کوئین
آگاتا_کریستی
سی_و_ششمین_دوره_جشنواره_فیلم_فجر
رت_باتلر
داریوش_فرهود
ریکی_مارتین
مغولستان
حسین_محب‌اهری
نادر_گلچین
آری_هان
زهره
بوف_کور
بیمارستان
لژیونر_(مجموعه_تلویزیونی)
سندرم_تریچر_کالینز
ماهواره_ظفر
بهمن_قبادی
اشک‌ها_و_لبخندها
سلطان_بن_سلمان_بن_عبدالعزیز_آل_سعود
کازابلانکا_(فیلم)
فریده_اولادقباد
جام_جهانی_فوتبال_۲۰۱۸
حزب_مؤتلفه_اسلامی
لوسیفر_(مجموعه_تلویزیونی)
آزاده_صمدی
حسین_قریب
مجید_جمالی_فشی
ناردون
یوسف_تیموری
باشگاه_فوتبال_بروسیا_دورتموند
جامی
سدیم_هیپوکلریت
مارسل_پروست
خط_۷_متروی_تهران
آشفته_(فیلم)
مرد_آرام
قاشق‌زنی
معصومه_مهرعلی
مصطفی_اردستانی
ژاله_آموزگار
دزیره_(رمان)
آکشی_کومار
سال_تقویمی
آزادراه_۲_(ایران)
صربستان
کهکشان
بوئینگ_سی-۱۷_گلوبمستر_۳
روز_ملی_خلیج_فارس
محمد_محقق
نان_نخودچی
لاکهید_ای‌سی-۱۳۰
استان_خراسان_رضوی
سریع_و_خشمگین_۶
آدرین_برودی
در_جستجوی_خوشبختی
شورانگیز_طباطبایی
امریکن_آیدل
کاجول
ویروس_زاده_خفاش
عزیزالله_خوشوقت
غلامعلی_جعفرزاده_ایمن‌آبادی
رود_کشکان
حسین_سهیلی‌زاده
برج_خلیج_دبی
همیشه_(فیلم_۱۹۸۹)
انتقام_(فیلم_۲۰۱۷)
بروجرد
مرتضی_پاشایی
احمد_مرادی
اسماعیل_نجار
علیرضا_استادی
گاو
قمر_در_عقرب
سام_و_نرگس
فدریکو_والورده
شیرین_و_فرهاد
بیژن_بنفشه‌خواه
بیماری_پروانه‌ای
روز_جهانی_کتاب_کودک
یول_برینر
زاپاس_(فیلم)
چتری_برای_دو_نفر
مافیا
تاریخ_گاه‌شماری_ایرانی
فرشید_امین
ناتالی_وود
مردان_آهنین
سوخو-۲۴
صمد_بهرنگی
اجی_دیوگن
اکبر_خواجویی
عبدالحمید_خدری
نایف_بن_عبدالعزیز_آل_سعود
تصویر_ذهنی_(فیلم)
طبل_توخالی_(مجموعه_تلویزیونی)
مهرانه_مهین‌ترابی
مردم_بلوچ
غلامرضا_نیک‌پی
باشگاه_فوتبال_ناپولی
مهدی_خزعلی
اردشیر_رستمی
محمدرضا_عادلخانی
دلار_آمریکا
سید_محمد_حسینی_شیرازی
عبدالکریم_لاهیجی
السا_فیروزآذر
ماجراهای_تن‌تن_و_میلو
دیوداس_(فیلم_۲۰۰۲)
ایرنا_سندلروا
رضا_کرم‌رضایی
موش
علی‌آباد_کتول
اسکار_شیندلر
سیرجان
اختاپوس_(آهوی_پیشونی‌سفید)
دیوانه_از_قفس_پرید
جیک_جیلنهال
چارلی_و_کارخانه_شکلات‌سازی_(فیلم)
پیسی
مسعود_امینی_(ترانه‌سرا)
مرکز_پخش_خاورمیانه
لیگ_برتر_فوتبال_ایران_۹۹–۱۳۹۸
به‌سوی_ستارگان
رفقای_خوب
یکشنبه_نخل
محمد_صالح‌علاء
رابین_ویلیامز
پادماده
اورلندو،_فلوریدا
الیسون_بکر
لشکر_فاطمیون
سیمین_دانشور
ذبیح‌الله_صفائی
هامفری_بوگارت
کنیا
برادران_کارامازوف
پیمان_ابدی
مایکل_جردن
سونی
ندا_آقاسلطان
باشگاه_فوتبال_الهلال
بن_هور_(فیلم_۱۹۵۹)
بینوایان_(فیلم_۲۰۱۲)
حسین_علیزاده
دختران_(فیلم_۱۳۸۸)
کاشان
قصیده
حبیب_رضایی
شوخی_با_دیک_و_جین_(فیلم_۲۰۰۵)
سید_ضیاءالدین_دری
یوری_گاگارین
بیماری_ویروسی
ابوبکر
علی_بن_موسی_الرضا
علی_علی‌پور
شورای_عالی_بورس_و_اوراق_بهادار_ایران
سید_ابوالقاسم_کاشانی
عباس_آقازمانی
برزیل
احمد_کشوری
ایسلند
سیسیل
برانکو_ایوانکوویچ
آفساید
هادی_خسروشاهی
علی_دهکردی
بدون_توقف_(فیلم_۲۰۱۴)
ریانا
مایکروسافت
سورنا_ستاری
سید_احمد_خسروشاهی
ضیاءالدین_نبوی
حسن_ممدوحی
بن_هور_(فیلم_۲۰۱۶
اسکیمو
احمد_ایراندوست
ویرجیل_فن_دایک
علیرضا_داوودنژاد
باشگاه_فوتبال_آتالانتا
آرزوی_مرگ_(فیلم_۲۰۱۸)
آدرین_(بازیکن_فوتبال)
داسو_میراژ_اف۱
پل_ورسک
زنگ‌ها_برای_که_به_صدا_در_می‌آیند_(فیلم)
عفونت
طایفه_ریگی
میرزا_کوچک_خان_جنگلی
سلولز
کیلین_ام‌باپه
حسین_رضازاده
سکته
فاتح_تریم
بنیامین_نتانیاهو
آلبومین
سه_تفنگدار
دعای_فرج_(عظم_البلاء)
دودمان_صفویان
جنبش_عدالت‌خواه_دانشجویی
کینه_(فیلم_۲۰۰۴)
ژوزه_مورینیو
خندوانه
نهنگ_آبی_(مجموعه_نمایش_خانگی)
علی‌رضا_آزمندیان
افسانه_پاکرو
[truncated: 2,165 more rows]
